# Supplementary material for: Sulfur embedded in metal organic framework-derived hierarchically porous carbon nanoplates for high performance lithium–sulfur battery
Source: Royal Society of Chemistry journal article supplement (doi:10.1039/c3ta00004d), 2013-01-01
Supplement: c3ta00004d.pdf [file c3ta00004d.pdf]

## **Electronic Supplementary Information (ESI)**

### **Sulfur Embedded in Metal Organic Framework-Derived Hierarchically Porous Carbon Nanoplates for High Performance Lithium-Sulfur Battery**

**Guiyin Xu, Bing Ding, Laifa Shen, Ping Nie, Jinpeng Han and Xiaogang Zhang<sup>\*</sup>**

College of Material Science and Engineering and Key Laboratory for Intelligent Nano  
Materials and Devices of Ministry of Education  
Nanjing University of Aeronautics and Astronautics, Nanjing, 210016, P. R. China  
E-mail: *azhangxg@163.com*

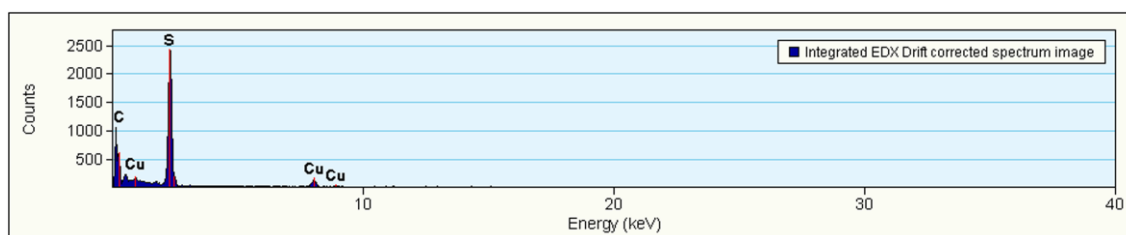

**Figure S1.** Energy dispersive X-ray analysis (EDX) of the HPCN/S composite confirms the absence of Zn species.
